# Supplementary material for: Alternative ergosterol biosynthetic pathways confer antifungal drug resistance in the human pathogens within the Mucor species complex
Source: PubMed Central journal article supplement (PMC11323496; doi:10.1128/mbio.01661-24), 2024-07-09
Supplement: mbio.01661-24-s0004.pdf [file mbio.01661-24-s0004.pdf]

Table S1

| Name  | Species                                                       | JGI Protein ID | FungiDB Gene ID  | EnsemblFungi Gene ID |
|-------|---------------------------------------------------------------|----------------|------------------|----------------------|
| Erg3  | <i>Candida albicans</i> SC5314                                | 59490          | C1_04770C_A      | C1_04770C_A          |
| Erg3  | <i>Choanephora cucurbitarum</i> NRRL2744                      | 516289         |                  |                      |
| Erg3  | <i>Cunninghamella echinulata</i> NRRL1382                     | 185651         |                  |                      |
| Erg3  | <i>Cryptococcus neoformans</i> H99                            | 446            | CNAG_00519       | CNAG_00519           |
| Erg3a | <i>Lichtheimia corymbifera</i> JMRC:FSU:9682                  | 10330          | LCOR_09389.1     | LCOR_09389.1         |
| Erg3b | <i>Lichtheimia corymbifera</i> JMRC:FSU:9682                  | 4998           | LCOR_04579.1     | LCOR_04579.1         |
| Erg3a | <i>Lichtheimia ramosa</i> JMRC:FSU:6197                       | 7192           |                  | LRAMOSA02887         |
| Erg3b | <i>Lichtheimia ramosa</i> JMRC:FSU:6197                       | 11099          |                  | LRAMOSA06288         |
| Erg3  | <i>Malassezia pachydermatis</i> CBS1879                       | 2056           | Malapachy_0912   | Malapachy_0912       |
| Erg3  | <i>Mucor circinelloides</i> 1006PhL                           | 6367           | HMPREF1544_06438 | HMPREF1544_06438     |
| Erg3  | <i>Mucor lusitanicus</i> MU402                                | 1381623        |                  |                      |
| Erg3  | <i>Mucor lusitanicus</i> CBS277.49 v2.0                       | 156917         | QYA_156917       | MUCCIDRAFT_156917    |
| Erg3  | <i>Mucor racemosus</i> UBOCC-A-109155                         | 3973           |                  |                      |
| Erg3  | <i>Phycomyces blakesleeanus</i> NRRL1555                      | 178901         | PHYBL_178901     |                      |
| Erg3a | <i>Rhizopus azygosporus</i> CBS357.93                         |                |                  | CU097_003763         |
| Erg3b | <i>Rhizopus azygosporus</i> CBS357.93                         |                |                  | CU097_010180         |
| Erg3a | <i>Rhizopus delemar</i> 99-880                                | 4689           | RO3G_07367       | RO3G_07367           |
| Erg3b | <i>Rhizopus delemar</i> 99-880                                | 7668           | RO3G_13407       | RO3G_13407           |
| Erg3  | <i>Rhizopus microsporus</i> var. <i>microsporus</i> ATCC52813 | 213209         |                  | RHIMIDRAFT_213209    |
| Erg3  | <i>Saccharomyces cerevisiae</i> S288C                         | 4075           | YLR056W          | YLR056W              |
| Erg31 | <i>Schizosaccharomyces pombe</i> 972h-                        | 372            | SPAC1687.16c     | SPAC1687.16c         |
| Erg32 | <i>Schizosaccharomyces pombe</i> 972h-                        | 2860           | SPBC27B12.03c    | SPBC27B12.03c        |
| Erg3  | <i>Spizellomyces punctatus</i> DAOM BR117                     | 5830           | SPPG_02338       | SPPG_02338           |
| Erg3  | <i>Syncephalastrum racemosum</i> NRRL2496                     | 499858         |                  |                      |
| Erg3a | <i>Sporodiniella umbellata</i> MES 1446                       | 444990         |                  |                      |
| Erg3b | <i>Sporodiniella umbellata</i> MES 1446                       | 496186         |                  |                      |
| Erg3  | <i>Ustilago maydis</i> 521                                    | 10884          | UMAG_03593       | UMAG_03593           |

**Table S1.** Erg3 amino acid sequences obtained from the genomes of listed fungal species. Identification numbers from different databases [Joint Genome Institute MycoCosm (JGI, <https://mycocosm.jgi.doe.gov>), Fungi Database (FungiDB, <https://fungidb.org>) and Ensembl Fungi (<https://fungi.ensembl.org>)] are indicated to facilitate accessibility and reproducibility.

Table S2

| Name  | Species                                                       | JGI Protein ID | FungiDB Gene ID  | EnsemblFungi Gene ID |
|-------|---------------------------------------------------------------|----------------|------------------|----------------------|
| Erg6  | <i>Candida albicans</i> SC5314                                | 57503          | C3_02150C_A      | C3_02150C_A          |
| Erg6a | <i>Choanephora cucurbitarum</i> NRRL2744                      | 208609         |                  |                      |
| Erg6b | <i>Choanephora cucurbitarum</i> NRRL2744                      | 449520         |                  |                      |
| Erg6a | <i>Cunninghamella echinulata</i> NRRL1382                     | 280554         |                  |                      |
| Erg6  | <i>Cryptococcus neoformans</i> H99                            | 3420           | CNAG_03819       | CNAG_03819           |
| Erg6a | <i>Lichtheimia corymbifera</i> JMRC:FSU:9682                  | 1250           | LCOR_01192.1     | LCOR_01192.1         |
| Erg6b | <i>Lichtheimia corymbifera</i> JMRC:FSU:9682                  | 3633           | LCOR_03386.1     | LCOR_03386.1         |
| Erg6d | <i>Lichtheimia corymbifera</i> JMRC:FSU:9682                  | 3987           | LCOR_03695.1     | LCOR_03695.1         |
| Erg6a | <i>Lichtheimia ramosa</i> JMRC:FSU:6197                       | 1343           |                  | LRAMOSAA06893        |
| Erg6b | <i>Lichtheimia ramosa</i> JMRC:FSU:6197                       | 536            |                  | LRAMOSAA00533        |
| Erg6d | <i>Lichtheimia ramosa</i> JMRC:FSU:6197                       | 2430           |                  | LRAMOSAA07977        |
| Erg6  | <i>Malassezia pachydermatis</i> CBS1879                       | 2313           | Malapachy_1146   | Malapachy_1146       |
| Erg6a | <i>Mucor circinelloides</i> 1006PhL                           | 10718          | HMPREF1544_10842 | HMPREF1544_10842     |
| Erg6b | <i>Mucor circinelloides</i> 1006PhL                           | 8587           | HMPREF1544_08689 | HMPREF1544_08689     |
| Erg6c | <i>Mucor circinelloides</i> 1006PhL                           | 9624           | HMPREF1544_09736 | HMPREF1544_09736     |
| Erg6a | <i>Mucor lusitanicus</i> MU402                                | 1319648        |                  |                      |
| Erg6b | <i>Mucor lusitanicus</i> MU402                                | 1325190        |                  |                      |
| Erg6c | <i>Mucor lusitanicus</i> MU402                                | 1448211        |                  |                      |
| Erg6a | <i>Mucor lusitanicus</i> CBS277.49 v2.0                       | 155859         | QYA_155859       | MUCCIDRAFT_155859    |
| Erg6b | <i>Mucor lusitanicus</i> CBS277.49 v2.0                       | 151310         | QYA_151310       | MUCCIDRAFT_151310    |
| Erg6c | <i>Mucor lusitanicus</i> CBS277.49 v2.0                       | 74496          | QYA_74496        | MUCCIDRAFT_74496     |
| Erg6a | <i>Mucor racemosus</i> UBOCC-A-109155                         | 9296           |                  |                      |
| Erg6b | <i>Mucor racemosus</i> UBOCC-A-109155                         | 5625           |                  |                      |
| Erg6c | <i>Mucor racemosus</i> UBOCC-A-109155                         | 11127          |                  |                      |
| Erg6a | <i>Phycomyces blakesleeanus</i> NRRL1555                      | 128748         | PHYBL_128748     |                      |
| Erg6b | <i>Phycomyces blakesleeanus</i> NRRL1555                      | 114967         | PHYBL_114967     |                      |
| Erg6a | <i>Rhizopus azygosporus</i> CBS357.93                         |                |                  | CU097_001869         |
| Erg6a | <i>Rhizopus delemar</i> 99-880                                | 9579           | RO3G_15767       | RO3G_15767           |
| Erg6e | <i>Rhizopus delemar</i> 99-880                                | 1008           | RO3G_16049       | RO3G_16049           |
| Erg6a | <i>Rhizophagus irregularis</i> DAOM 197198                    | 1517096        |                  |                      |
| Erg6b | <i>Rhizophagus irregularis</i> DAOM 197198                    | 1668347        |                  |                      |
| Erg6a | <i>Rhizopus microsporus</i> var. <i>microsporus</i> ATCC52813 | 203690         |                  | RHIMIDRAFT_203690    |
| Erg6  | <i>Saccharomyces cerevisiae</i> S288C                         | 4664           | YML008C          | YML008C              |
| Erg6  | <i>Schizosaccharomyces pombe</i> 972h-                        | 3100           | SPBC16E9.05      | SPBC16E9.05          |
| Erg6  | <i>Spizellomyces punctatus</i> DAOM BR117                     | 8734           | SPPG_05059       | SPPG_05059           |
| Erg6a | <i>Syncephalastrum racemosum</i> NRRL2496                     | 499603         |                  |                      |
| Erg6b | <i>Syncephalastrum racemosum</i> NRRL2496                     | 466111         |                  |                      |
| Erg6a | <i>Sporodiniella umbellata</i> MES 1446                       | 459696         |                  |                      |
| Erg6e | <i>Sporodiniella umbellata</i> MES 1446                       | 469068         |                  |                      |
| Erg6  | <i>Ustilago maydis</i> 521                                    | 10455          | UMAG_03182       | UMAG_03182           |

**Table S2.** Erg6 amino acid sequences obtained from the genomes of listed fungal species. Identification numbers from different databases [Joint Genome Institute MycoCosm (JGI, <https://mycocosm.jgi.doe.gov>), Fungi Database (FungiDB, <https://fungidb.org>) and Ensembl Fungi (<https://fungi.ensembl.org>)] are indicated to facilitate accessibility and reproducibility.

Table S3

| Strain  | Species                  | Genotype                                                   | Reference  |
|---------|--------------------------|------------------------------------------------------------|------------|
| MU402   | <i>M. lusitanicus</i>    | <i>pyrG<sup>-</sup> leuA<sup>-</sup></i>                   | (75)       |
| MU636   | <i>M. lusitanicus</i>    | <i>pyrG<sup>-</sup>::pyrG<sup>+</sup> leuA<sup>-</sup></i> | (35)       |
| MIN11   | <i>M. lusitanicus</i>    | <i>erg3::pyrG leuA<sup>-</sup></i>                         | This study |
| MIN12   | <i>M. lusitanicus</i>    | <i>erg3::pyrG leuA<sup>-</sup></i>                         | This study |
| MIN13   | <i>M. lusitanicus</i>    | <i>erg6a::pyrG leuA<sup>-</sup></i>                        | This study |
| MIN14   | <i>M. lusitanicus</i>    | <i>erg6a::pyrG leuA<sup>-</sup></i>                        | This study |
| 1006PhL | <i>M. circinelloides</i> | wildtype                                                   | (39)       |
| MIN6    | <i>M. circinelloides</i> | <i>pyrF-59Δ</i>                                            | This study |
| CPA6    | <i>M. circinelloides</i> | <i>pyrF-59Δ::pyrF<sup>+</sup></i>                          | This study |
| MIN15   | <i>M. circinelloides</i> | <i>erg3::pyrF</i>                                          | This study |
| MIN16   | <i>M. circinelloides</i> | <i>erg3::pyrF</i>                                          | This study |
| MIN17   | <i>M. circinelloides</i> | <i>erg6a::pyrF</i>                                         | This study |
| MIN18   | <i>M. circinelloides</i> | <i>erg6a::pyrF</i>                                         | This study |

**Table S3.** Strains used in this study, showing from which species they derive, genotype, and references.

Table S4

| Name      | Species    | Sequence (5' → 3')                              | Description                                     |
|-----------|------------|-------------------------------------------------|-------------------------------------------------|
| JOHE51488 | <i>Mlu</i> | TGCCTCAGCATTGGTACTTG                            | <i>pyrG</i> PCR                                 |
| JOHE51489 | <i>Mlu</i> | GTACACTGGCCATGCTATCG                            | <i>pyrG</i> PCR                                 |
| JOHE51528 | <i>Mlu</i> | CGATAGCATGGCCAGTGTACTAGAGTTTACGATGCAGGCCAGT     | <i>erg3</i> deletion, overlap with <i>pyrG</i>  |
| JOHE51539 | <i>Mlu</i> | CAAGTACCAATGCTGAGGCAATTTCTGTGTGTCAGTCCGCAC      | <i>erg3</i> deletion, overlap with <i>pyrG</i>  |
| JOHE51529 | <i>Mlu</i> | ATTAGAACAGAAGGGCAGTCGG                          | <i>erg3</i> deletion                            |
| JOHE51538 | <i>Mlu</i> | CGATCATGCTTACGGTGGTTGAGT                        | <i>erg3</i> deletion                            |
| JOHE51540 | <i>Mlu</i> | CGATAGCATGGCCAGTGTACGTGTGCCAAGTGTAGATGTTGTG     | <i>erg6a</i> deletion, overlap with <i>pyrG</i> |
| JOHE51552 | <i>Mlu</i> | CAAGTACCAATGCTGAGGCACATCTGTCTCAATATCCGTCGTC     | <i>erg6a</i> deletion, overlap with <i>pyrG</i> |
| JOHE51541 | <i>Mlu</i> | ATTTGCCCCGCTGTAGATGATAC                         | <i>erg6a</i> deletion                           |
| JOHE51551 | <i>Mlu</i> | AGTGTAGCAAAAGTTGCCCTTG                          | <i>erg6a</i> deletion                           |
| JOHE51511 | <i>Mlu</i> | ACCTTGAGCACACAAACAAAGG                          | <i>pyrG</i> , 5' junction PCR                   |
| JOHE51510 | <i>Mlu</i> | CCTTTGTTTGTGTGCTCAAGGT                          | <i>pyrG</i> , 3' junction PCR                   |
| JOHE51533 | <i>Mlu</i> | ACAGGAAGTGAGTACAACGGACA                         | <i>erg3</i> , 5' junction PCR                   |
| JOHE51534 | <i>Mlu</i> | CATCGCCTCATACTACTCAAAGC                         | <i>erg3</i> , 3' junction PCR                   |
| JOHE51531 | <i>Mlu</i> | TGTGGTATCTACTGGTTCCATCG                         | <i>erg3</i> , WT allele PCR                     |
| JOHE51536 | <i>Mlu</i> | ATGTTGTGTGTCGAGTAGCACC                          | <i>erg3</i> , WT allele PCR                     |
| JOHE51545 | <i>Mlu</i> | GTCTATGTGGCGCTCAATTCTAC                         | <i>erg6a</i> , 5' junction PCR                  |
| JOHE51546 | <i>Mlu</i> | GCGTCCTCTCCATTCTACTAC                           | <i>erg6a</i> , 3' junction PCR                  |
| JOHE51543 | <i>Mlu</i> | GCTGGTGATATTACGAGTCTGC                          | <i>erg6a</i> , WT allele PCR                    |
| JOHE51549 | <i>Mlu</i> | GGAGAGATTTGATGGTGGTGT                           | <i>erg6a</i> , WT allele PCR                    |
| JOHE51498 | <i>Mci</i> | AGAATGCCAGACCTGAATTTTTGG                        | <i>pyrF</i> PCR                                 |
| JOHE51499 | <i>Mci</i> | AATAGTAATACCTCTGCCAACGG                         | <i>pyrF</i> PCR                                 |
| JOHE51623 | <i>Mci</i> | CCGTTGGCAGAGGGTATTACTATTGATATGGTAGCGAACCCGATG   | <i>erg3</i> deletion, overlap with <i>pyrF</i>  |
| JOHE51628 | <i>Mci</i> | CCAAAAATTCAGGTCTGGCATTCTAATTTCTGTGTGTCAGTCCGCAC | <i>erg3</i> deletion, overlap with <i>pyrF</i>  |
| JOHE51624 | <i>Mci</i> | GGATGAGTCTTCAGGTGCAGTAA                         | <i>erg3</i> deletion                            |
| JOHE51627 | <i>Mci</i> | AATCCGAGAATGATGTGTAATACC                        | <i>erg3</i> deletion                            |
| JOHE51630 | <i>Mci</i> | CCGTTGGCAGAGGGTATTACTATTCAACATCAAATCTCTCCCCTTC  | <i>erg6a</i> deletion, overlap with <i>pyrF</i> |
| JOHE51634 | <i>Mci</i> | CCAAAAATTCAGGTCTGGCATTCTCTCAATATCCGTCTTCCCCTTAC | <i>erg6a</i> deletion, overlap with <i>pyrF</i> |
| JOHE51629 | <i>Mci</i> | AAGATTGGAGCACCTCAAGAGAC                         | <i>erg6a</i> deletion                           |
| JOHE51633 | <i>Mci</i> | AGTCGTGCAGCAGGTAGTTTTAG                         | <i>erg6a</i> deletion                           |
| JOHE51503 | <i>Mci</i> | GAGCAGCAGCATAGAAAGTACCA                         | <i>pyrF</i> , 5' junction PCR                   |
| JOHE51504 | <i>Mci</i> | TATCAAGAAGGACTAGGCTTGCC                         | <i>pyrF</i> , 3' junction PCR                   |
| JOHE51625 | <i>Mci</i> | TGTCACCTACACGAATCTTACCC                         | <i>erg3</i> , 5' junction PCR                   |
| JOHE51626 | <i>Mci</i> | AGAGAATATGGCGCTTCAGAGAC                         | <i>erg3</i> , 3' junction PCR                   |
| JOHE51625 | <i>Mci</i> | TGTCACCTACACGAATCTTACCC                         | <i>erg3</i> , WT allele PCR                     |
| JOHE51637 | <i>Mci</i> | TGTTTCATCGGTGGGTTGACG                           | <i>erg3</i> , WT allele PCR                     |
| JOHE51631 | <i>Mci</i> | CTGATTTACAGTACGCCTGAGT                          | <i>erg6a</i> , 5' junction PCR                  |
| JOHE51632 | <i>Mci</i> | GGTAAAGAATATGGGCACAGGTC                         | <i>erg6a</i> , 3' junction PCR                  |
| JOHE51631 | <i>Mci</i> | CTGATTTACAGTACGCCTGAGT                          | <i>erg6a</i> , WT allele PCR                    |
| JOHE51641 | <i>Mci</i> | GCATCACCAACATTGGCAAG                            | <i>erg6a</i> , WT allele PCR                    |
| JOHE51712 | <i>Mci</i> | GCAAGGCGATATGGGTGTTG                            | <i>erg6b</i> , qPCR                             |
| JOHE51713 | <i>Mci</i> | GACTGAAGAGCGAAGAAACCC                           | <i>erg6b</i> , qPCR                             |
| JOHE51714 | <i>Mci</i> | ACTCAAGCTGGTCCGTATGC                            | <i>erg6c</i> , qPCR                             |
| JOHE51715 | <i>Mci</i> | ACAACAGAATCGCCTGCAAC                            | <i>erg6c</i> , qPCR                             |
| JOHE51665 | <i>Mci</i> | AGGGTCAATACACTCTTGAAG                           | <i>vma1</i> , qPCR                              |
| JOHE51667 | <i>Mci</i> | GGAGAACGAACAGGCCAGAG                            | <i>vma1</i> , qPCR                              |

**Table S4.** Species-specific primers [*M. lusitanicus* (*Mlu*) or *M. circinelloides* (*Mci*)] used in this study, showing systematic name, nucleotide sequence, and a brief description explaining its use.

Table S5

| Species                                                            | Database     | Reference |
|--------------------------------------------------------------------|--------------|-----------|
| <i>Candida albicans</i> SC5314                                     | JGI          | (78)      |
| <i>Choanephora cucurbitarum</i> NRRL2744 v1.0                      | JGI          | (79)      |
| <i>Cryptococcus neoformans</i> var. <i>grubii</i> H99              | JGI          | (80)      |
| <i>Cunninghamella echinulata</i> NRRL1382 v1.0                     | JGI          | (79)      |
| <i>Lichtheimia corymbifera</i> JMRC:FSU:9682                       | JGI          | (45)      |
| <i>Lichtheimia ramosa</i> JMRC:FSU:6197                            | JGI          | (81)      |
| <i>Malassezia pachydermatis</i> CBS1879                            | JGI          | (82)      |
| <i>Mucor circinelloides</i> 1006PhL                                | JGI          | (39)      |
| <i>Mucor lusitanicus</i> MU402 v1.0                                | JGI          | (38)      |
| <i>Mucor racemosus</i> UBOCC-A-109155                              | JGI          | (83)      |
| <i>Phycomyces blakesleeanus</i> NRRL1555 v2.0                      | JGI          | (37)      |
| <i>Rhizophagus irregularis</i> DAOM 197198 v2.0                    | JGI          | (84)      |
| <i>Rhizopus azygosporus</i> CBS357.93                              | EnsemblFungi | (47)      |
| <i>Rhizopus delemar</i> 99-880                                     | JGI          | (46)      |
| <i>Rhizopus microsporus</i> var. <i>microsporus</i> ATCC52813 v1.0 | JGI          | (85)      |
| <i>Saccharomyces cerevisiae</i> S288C                              | JGI          | (86)      |
| <i>Schizosaccharomyces pombe</i> 972h-                             | JGI          | (87)      |
| <i>Spizellomyces punctatus</i> DAOM BR117                          | JGI          | (88)      |
| <i>Sporodiniella umbellata</i> MES 1446 v1.0                       | JGI          | (79)      |
| <i>Syncephalastrum racemosum</i> NRRL2496 v1.0                     | JGI          | (89)      |
| <i>Ustilago maydis</i> 521                                         | JGI          | (90)      |

**Table S5.** Proteomes from these species were obtained from publicly available repositories either at the Joint Genome Institute MycoCosm (JGI, <https://mycocosm.jgi.doe.gov>) or, if unavailable, at the EnsemblFungi (<https://fungi.ensembl.org>) databases.
